# Supplementary material
Source: publisher figshare collection journal article supplement (https://acs.figshare.com/ndownloader/files/4094227)
Supplement: Supplementary file 1 [file 4094227]

## Supporting Information

### Structure, stability and property modulations of stoichiometric graphene oxide

Shunhong Zhang<sup>1</sup>, Jian Zhou<sup>2</sup>, Qian Wang<sup>1,3,\*</sup>, and Puru Jena<sup>3</sup>

<sup>1</sup>Center for Applied Physics and Technology, PekingUniversity, Beijing 100871, China

<sup>2</sup>Department of Materials Science and Engineering, College of Engineering, PekingUniversity, Beijing 100871

<sup>3</sup>Department of Physics, Virginia Commonwealth University, Richmond, VA 23284

Qianwang2@pku.edu.cn

In the supporting Information, we provide some additional results for better understanding our studied system, including: structural parameters of all the studied structures, and the geometric structure, stability and electronic properties of a-GMO configuration, and single layer deposition of metal atoms on z-GMO.

## 1. Structural parameters

We list the structural parameters in Table S1 for all the studied systems.

**Table S1.** Geometrical parameters of GMO and GDO (the vacuum layer is set as 15Å, the lattice parameters are given in order of a, b, c,  $\alpha$ ,  $\beta$ ,  $\gamma$ ).

| Structure                    | Space group                  | Lattice parameters (Å) |      |      | Atom  | Wyckoff positions |        |        |
|------------------------------|------------------------------|------------------------|------|------|-------|-------------------|--------|--------|
| <b>z-GMO</b>                 | <i>Pmma</i> (51)             | 2.25                   | 2.68 | 15.0 | C(2e) | 0.7500            | 0.0000 | 0.4703 |
|                              |                              | 90°                    | 90°  | 90°  | O(2f) | 0.2500            | 0.5000 | 0.5854 |
| <b>a-GMO</b>                 | <i>Pmma</i> (51)             | 5.02                   | 2.27 | 15.0 | C(4i) | 0.4192            | 0.0000 | 0.4551 |
|                              |                              | 90°                    | 90°  | 90°  | O(4j) | 0.0100            | 0.5000 | 0.4045 |
| <b>ep-GMO</b> <sup>1,2</sup> | <i>Cmmm</i> (65)             | 2.64                   | 5.68 | 15.0 | C(4h) | 0.3259            | 0.0000 | 0.5000 |
|                              |                              | 90°                    | 90°  | 90°  | O(4l) | 0.5000            | 0.0000 | 0.5697 |
| <b>mix-GMO</b> <sup>2</sup>  | <i>Cm</i> (8)                | 9.42                   | 5.27 | 15.0 | C(4b) | 0.0484            | 0.1415 | 0.4401 |
|                              |                              | 90°                    | 90°  | 90°  | C(4b) | 0.9144            | 0.3110 | 0.4319 |
|                              |                              |                        |      |      | C(4b) | 0.2856            | 0.6432 | 0.4081 |
|                              |                              |                        |      |      | O(4b) | 0.1599            | 0.2344 | 0.3906 |
|                              |                              |                        |      |      | O(2a) | 0.8976            | 0.5000 | 0.5006 |
|                              |                              |                        |      |      | O(2a) | 0.9300            | 0.5000 | 0.3644 |
|                              |                              |                        |      |      | O(2a) | 0.3230            | 0.5000 | 0.3313 |
|                              |                              |                        |      |      | O(2a) | 0.5703            | 0.5000 | 0.5203 |
| <b>GDO</b>                   | <i>P4<sub>m</sub>2</i> (115) | 2.34                   | 2.34 | 15.0 | C(1c) | 0.5000            | 0.5000 | 0.5000 |
|                              |                              | 90°                    | 90°  | 90°  | O(2g) | 0.5000            | 0.0000 | 0.4587 |

## 2. The stability and properties of a-GMO configuration

As is mentioned in the main text, the total energy of the metastable a-GMO is slightly higher than z-GMO but still more energetically favorable than ep-GMO and mix-GMO. Here we present its optimized geometrical structure (Figure S1), dynamic

and thermodynamic stability (Figure S2), and electronic structure (Figure S3).

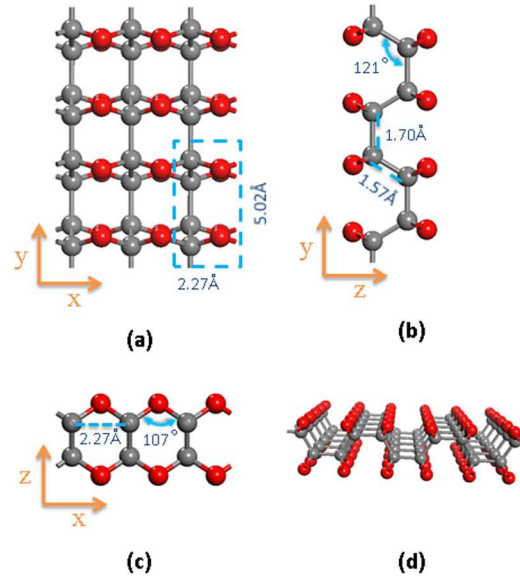

**Figure S1.** Different views of optimized a-GMO: (a) along z direction; (b) along x direction; (c) along y direction; (d) perspective view. Red and grey balls are oxygen and carbon atoms, respectively.

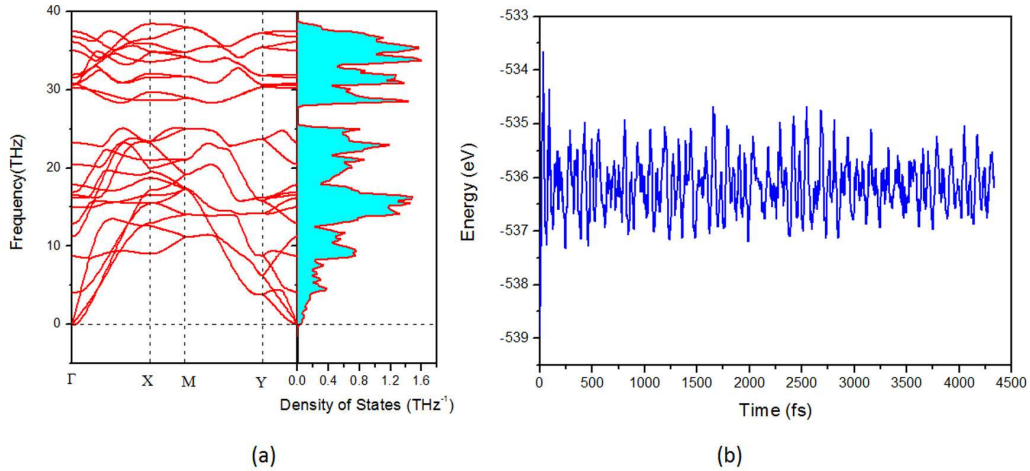

**Figure S2.** (a) Phonon dispersion band structures and the corresponding phonon density of states of a-GMO. The high symmetric Brillouin zone points are  $\Gamma$  (0, 0, 0), X (1/2, 0, 0), M (1/2, 1/2, 0), and Y (0, 1/2, 0). (b) Total energy fluctuation with respect to time during molecular dynamics simulations within a (3 $\times$ 3) supercell at the constant temperature of 300K.

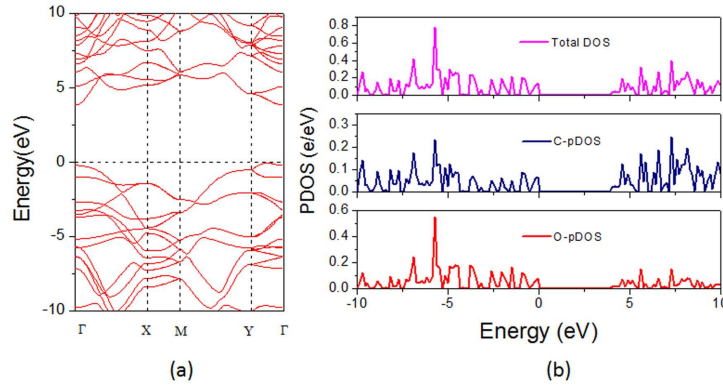

**Figure S3.** (a) Electronic band structure and (b) PDOS of a-GMO. The high symmetric Brillouin zone points in (a) are  $\Gamma$  (0, 0, 0), X (1/2, 0, 0), M (1/2, 1/2, 0) and Y (0, 1/2, 0).

The a-GMO structure (consisting of armchair carbon chains linked by O atoms) is a metastable state. It is interesting to note that the armchair carbon nanotubes are more metallic-like than the zigzag one, but a-GMO shows much larger energy band gap (3.90 eV) as compared with z-GMO (0.90 eV). Moreover, we found a-GMO displays larger anisotropy in its in-plane elastic modulus (See Table 1 in the main text). Since a-GMO can be stable up to 2000 K as the z-GMO does, and energy difference is quite small, a-GMO is also expected to be observed in experiment. The big differences between z-GMO and a-GMO in energy band gap and in-plane elastic modulus clearly indicate that the properties of graphene oxide are very sensitive to the structural details and synthesis details even in stoichiometric condition.

### 3. Deposition of metal atoms on z-GMO

Due to the special configuration of oxygen in z-GMO, the following question would be asked: is it possible to use z-GMO as a substrate for the single layer deposition of metal atoms? To explore this, we extensively studied the stability of

metal atoms on z-GMO including Li, Be, Mg, Al, K, Ca, Sc, Ti, V, Cr, Mn, Fe, Co, Ni Cu and Zn. We found that only Li can be stably absorbed on the z-GMO forming a single layer without clustering (Figure S4 in SI), where (1×2) reconstruction occurs resulting in slight bucklings. This is because the Li-O ionic bond (341 kJ/mol bond dissociation energy) is much more stable than Li-Li metal bond (106 kJ/mol bond dissociation energy). The stability of Li-z-GMO is verified through *ab initio* molecular dynamics simulations under 300 K for 5 ps.

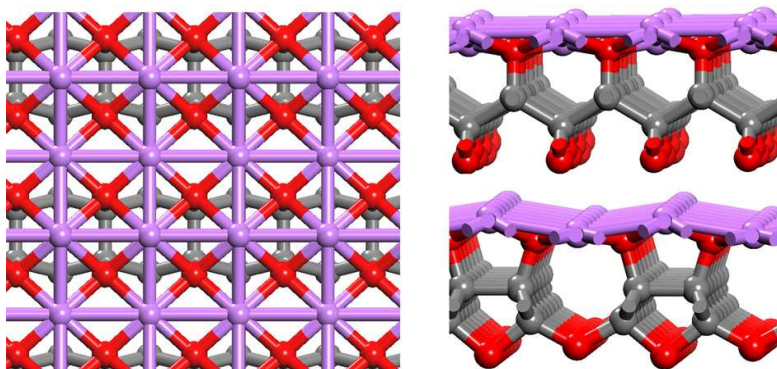

**Figure S4.** Different views of optimized geometry for Li-z-GMO.

## REFERENCES

- <sup>1</sup> Mattson, E. C.; Pu, H.; Cui, S.; Schofield, M. A.; Rhim, S.; Lu, G.; Nasse, M. J.; Ruoff, R. S.; Weinert, M.; Gajdardziska-Josifovska, M.; Chen, J. H.; Hirschmugl, C. *J. ACS Nano* **2011**, 5, 9710.
- <sup>2</sup> Xiang, H. J.; Wei, S.-H.; Gong, X. G. *Phys. Rev. B* **2010**, 82, 035416.
